# Supplementary material
Source: PubMed Central journal article supplement (PMC6779503)

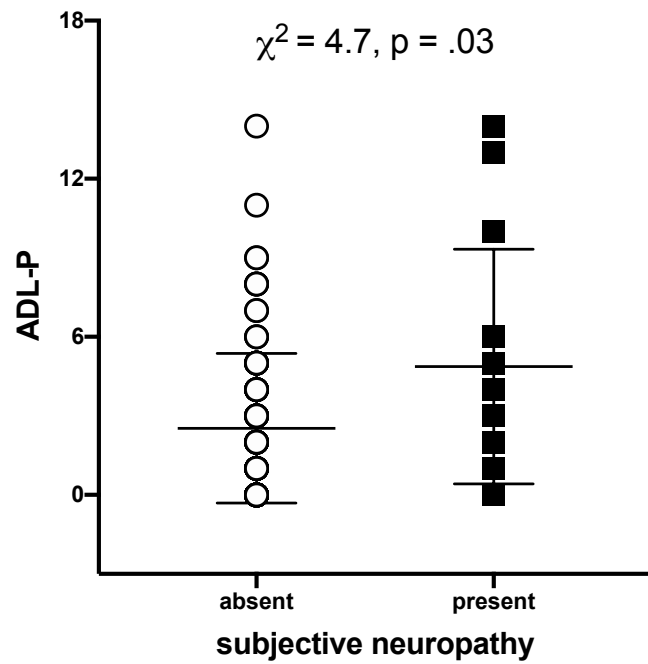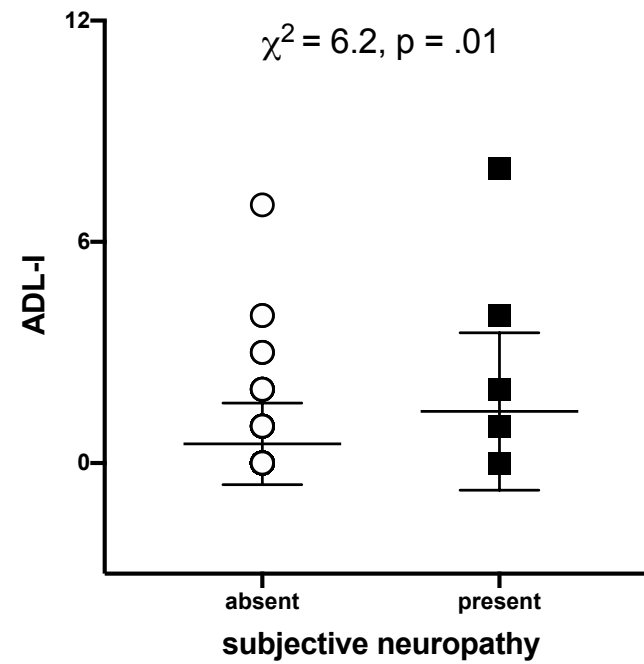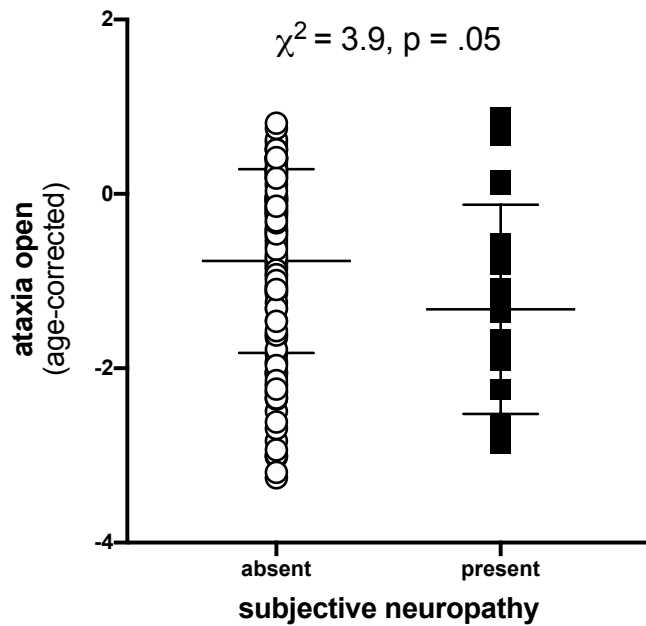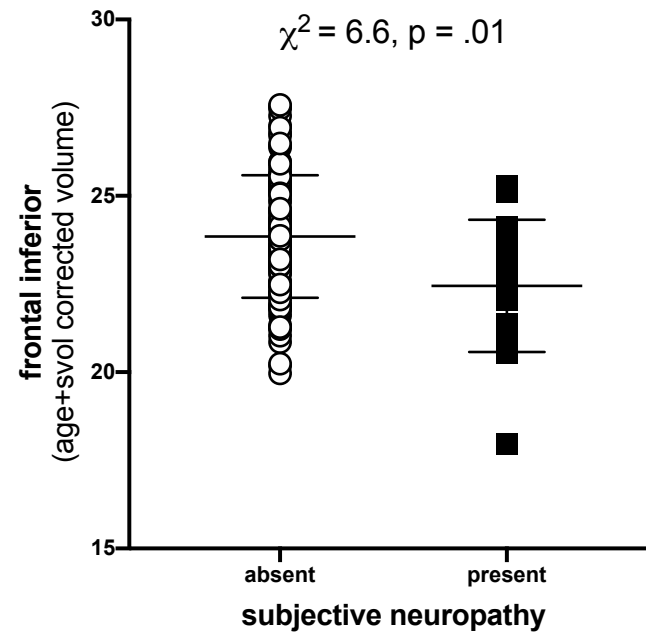

**Supplementary Figure 1**

Supplement: NIHMS1044889-supplement-Supp_figS16.pdf [file NIHMS1044889-supplement-Supp_figS16.pdf]
